# Supplementary material for: Expression of the switch receptor PD1/IL15Rβ in MSLN-CAR-T cells overcomes PD1/PDL1 signaling in solid tumors
Source: Research Square preprint supplement (doi:10.21203/rs.3.rs-7582501/v1), 2025-10-22
Supplement: Supplementary file 1 [file 63d37efb4174ffbe42fae059.pdf]

Fig. 1

A

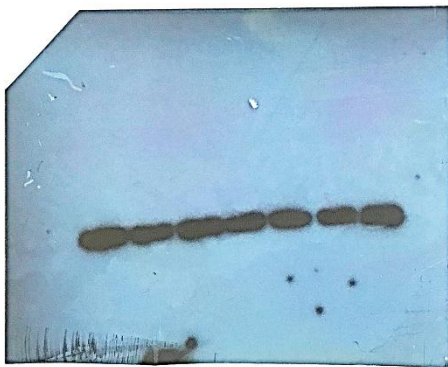

B

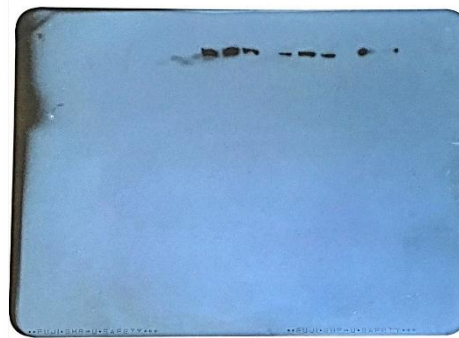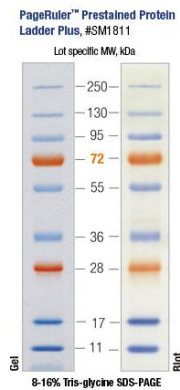

**Original blots presented in this study.** (A) Western blot analysis of  $\beta$ -actin protein expression. (B) Detection of STAT5 gene expression. Molecular weight markers are indicated on the right of panels.  $\beta$ -actin serves as a loading control to normalize protein levels across samples.

Fig. 2

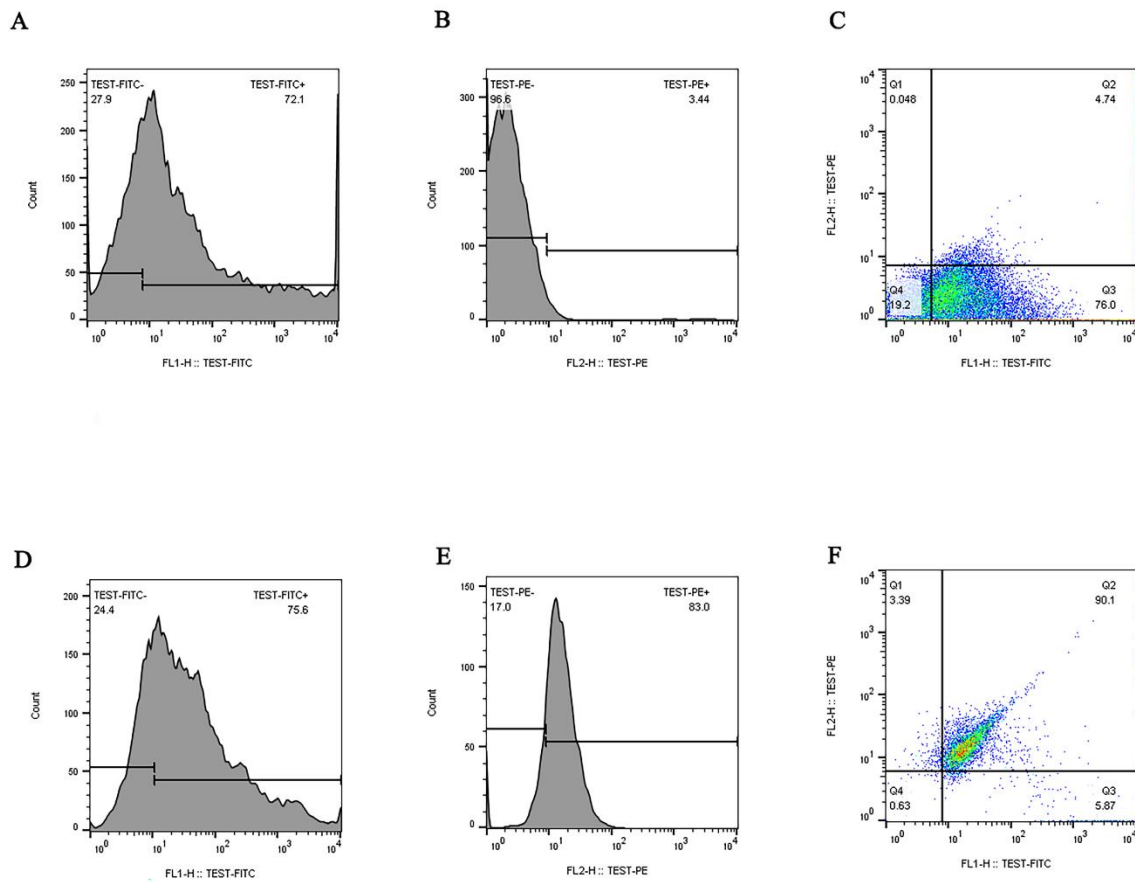

**Comparison of GFP and PD1 expression in transfected HEK 293T cells with CAR plasmids.** We evaluated the transfection efficiency of HEK 293T cells using flow cytometry. The cells were incubated with a PE-labeled anti-PD1 antibody for 30 minutes and then washed with PBS. Panels **A** and **C** show GFP-positive cells, confirming successful transfection with the MSLN-CAR plasmid. Panels **D** and **F** also display GFP-positive cells, while Panel **E** shows PD1-positive cells, indicating the transfection efficiency of the MSLN-PD1/IL15R $\beta$  construct. Notably, the expression levels of PD1 and GFP within the MSLN-PD1/IL15R $\beta$  construct appear to be comparable, thereby reinforcing the viability of GFP as a reliable indicator for CAR expression in this experimental context.

Fig. 3

**A**

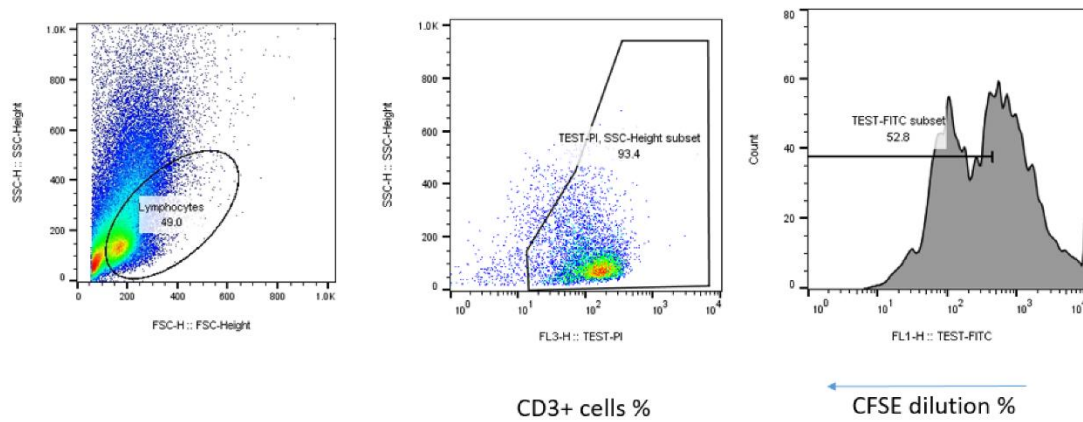

**B**

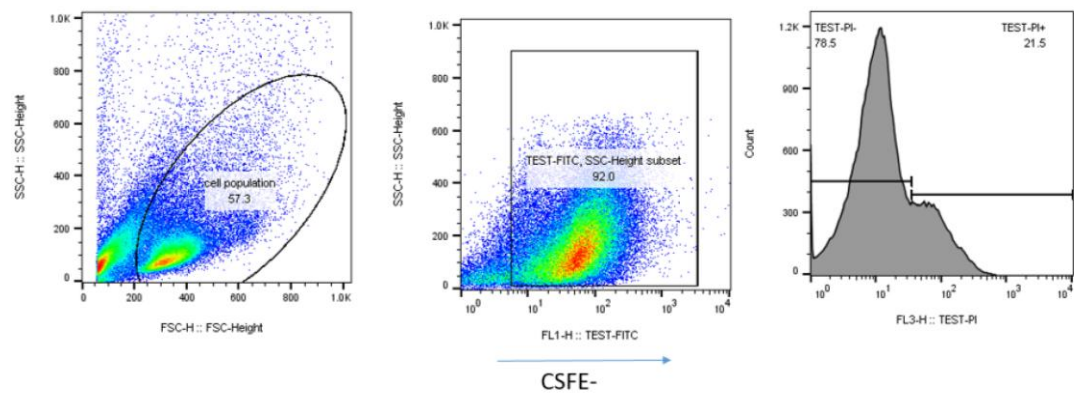

For proliferation and cytotoxicity assessment, we used a gating strategy. **A** To measure the proliferation rate of CAR T cells we labeled effector cells with carboxyfluorescein succinimidyl ester (CFSE) dye. After 72 hours of co-cultivation, we stained the combined population with APC-anti-CD3 antibody and evaluated the percentage of CFSE dilution in the gated CD3-positive cells. This percentage represents the proportion of proliferation. **B** We stained effector cells with CFSE dye and cultured them with target cells for 4 hours. Then, we stained the cells with propidium iodide (PI) to identify dead target cells as CFSE- and PI+.
